# Supplementary material
Source: PubMed Central journal article supplement (PMC7546161)

Chromosome 14

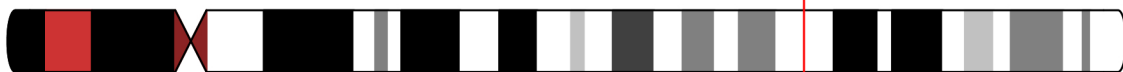

76.446 mb

76.448 mb

76.447 mb

76.449 mb

Gene  
Annotation  
UCSC

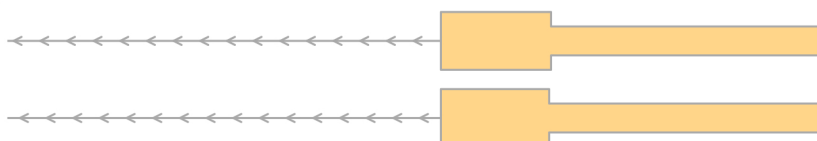

Gene  
Annotation  
ENSEMBL

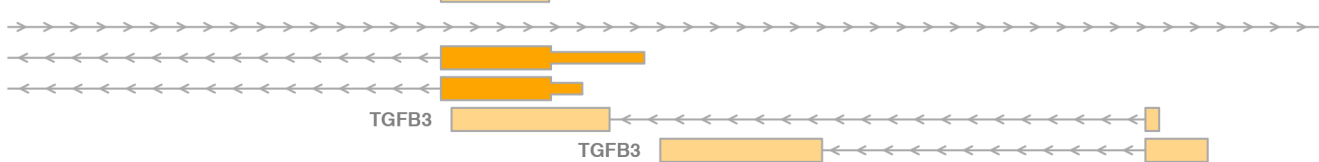

TGFβ3

TGFβ3

CpG  
Island

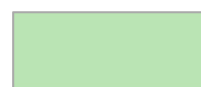

Chromatin  
State

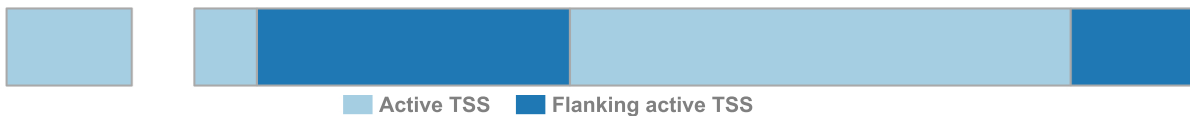

Active TSS

Flanking active TSS

Expression  
Spearman's  $\rho$

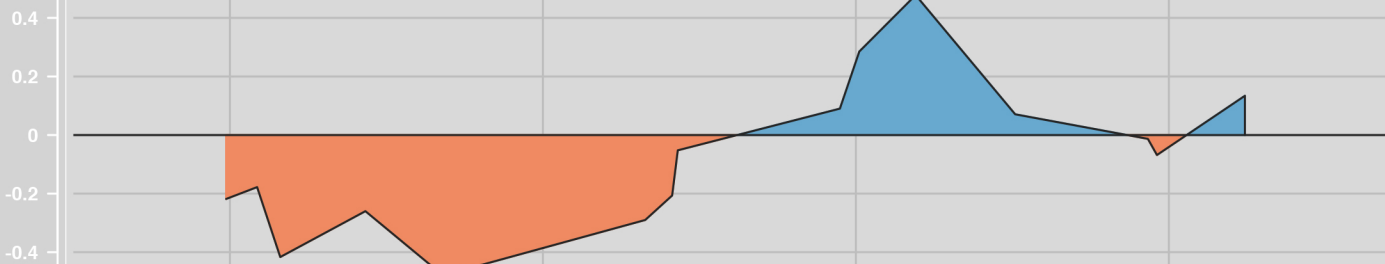

Overall Survival  
HR (95% CI)

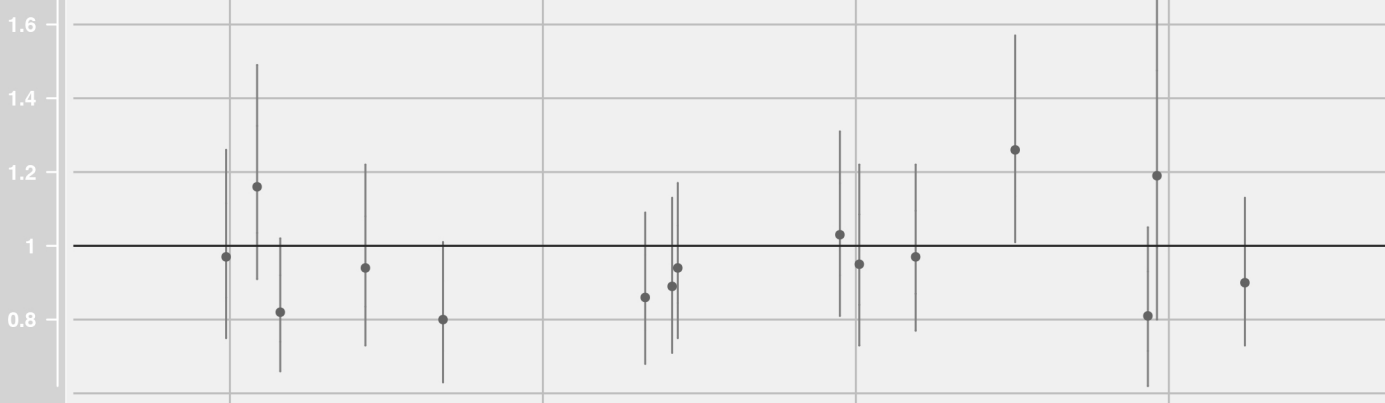

Supplement: epi-12-1273-s3.pdf [file epi-12-1273-s3.pdf]
