# Supplementary material
Source: PubMed Central journal article supplement (PMC7546161)

Chromosome 6

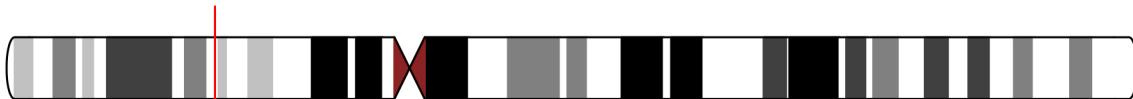

31.545 mb

31.546 mb

31.5455 mb

Gene  
Annotation  
UCSC

Gene  
Annotation  
ENSEMBL

CpG  
Island

Chromatin  
State

Quiescent/low

Weak transcription

Expression  
Spearman's  $\rho$

-0.1  
-0.2  
-0.3  
-0.4

Overall Survival  
HR (95% CI)

1.8  
1.6  
1.4  
1.2  
1.0

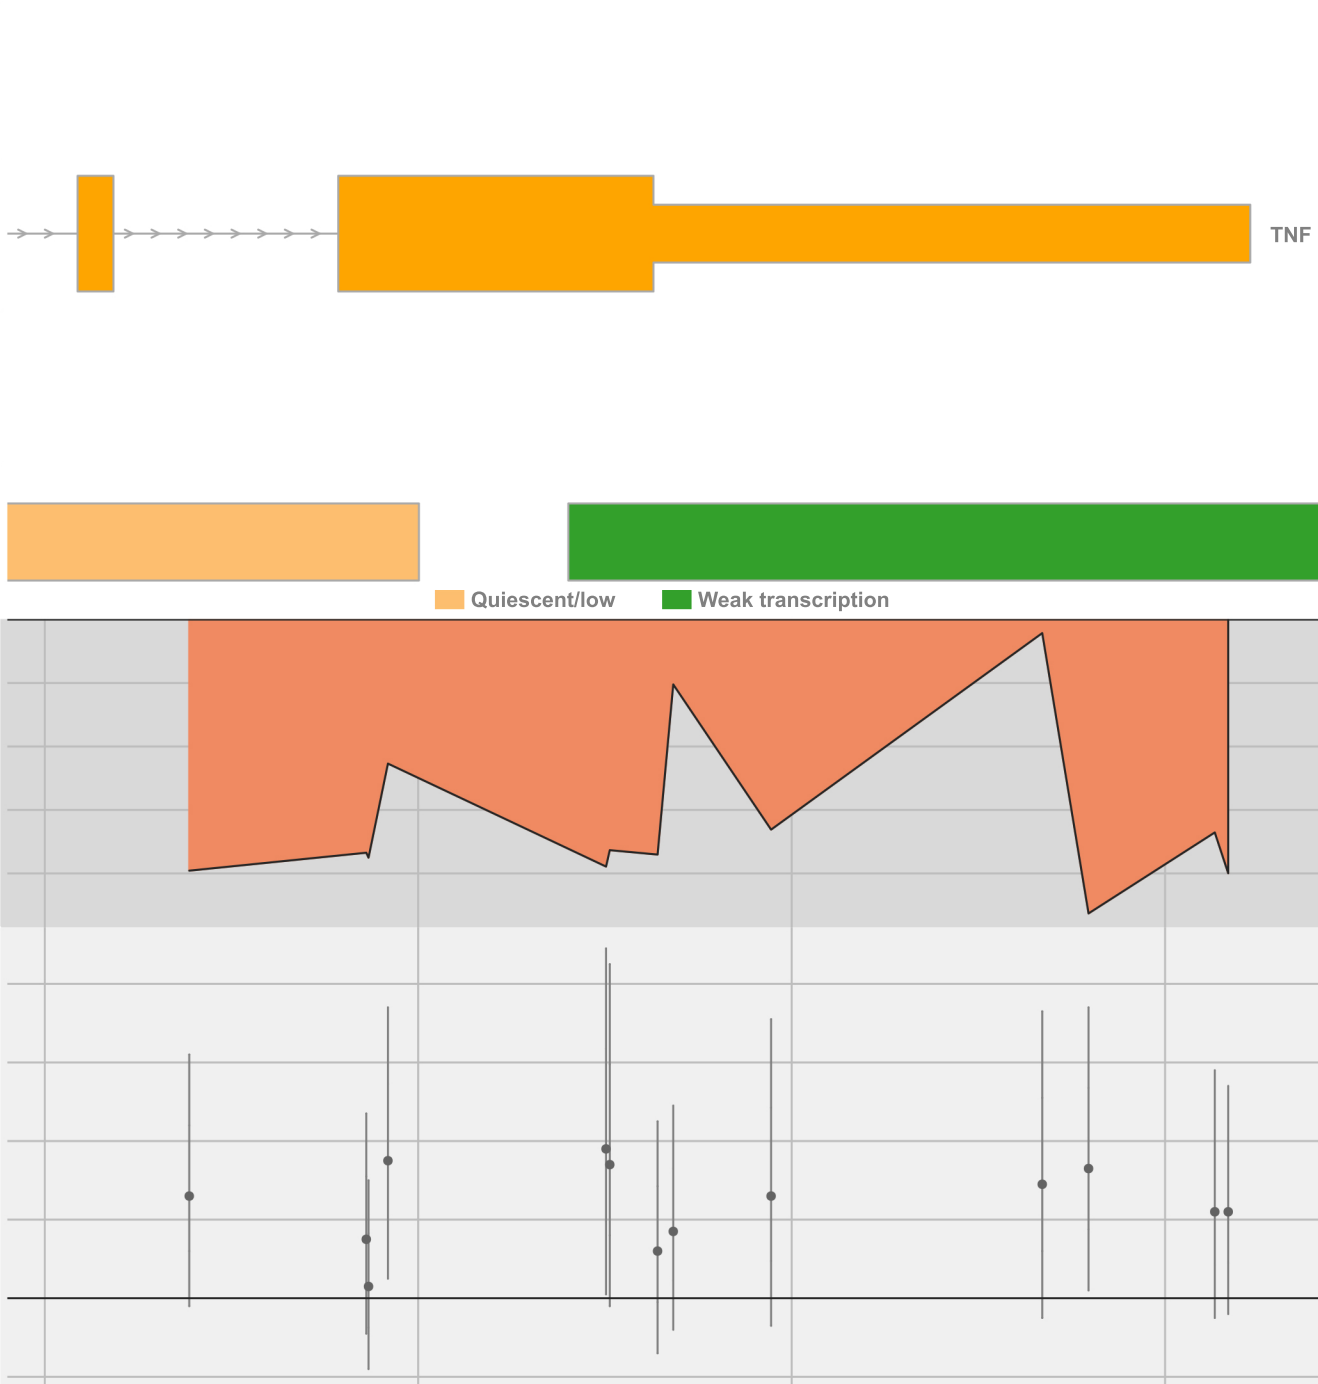

Supplement: epi-12-1273-s4.pdf [file epi-12-1273-s4.pdf]
