# Supplementary material
Source: PubMed Central journal article supplement (PMC7546161)

Chromosome 1

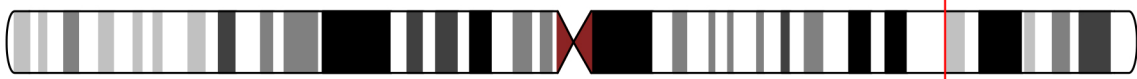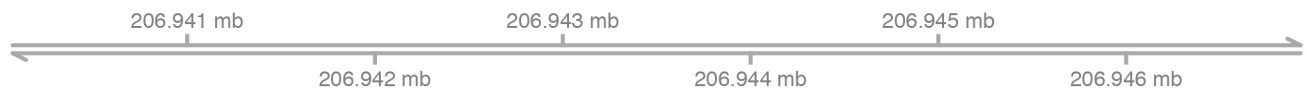

Gene Annotation UCSC

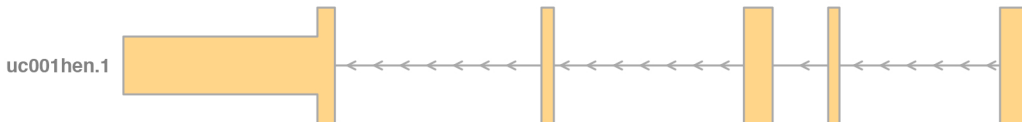

Gene Annotation ENSEMBL

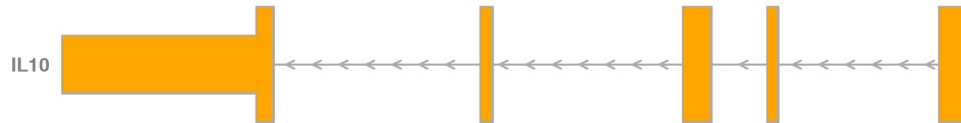

CpG Island

Chromatin State

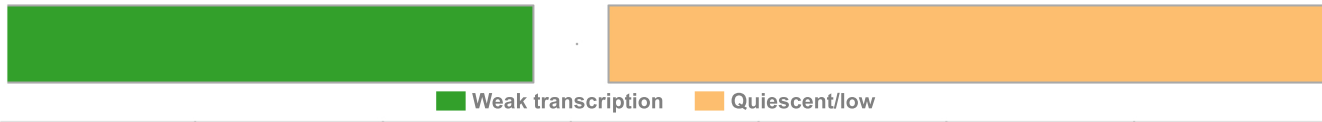

Expression Spearman's  $\rho$

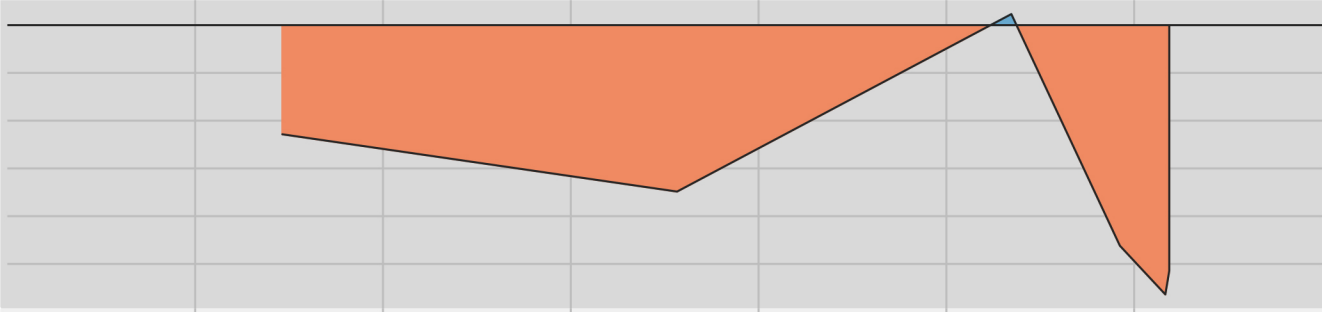

Overall Survival HR (95% CI)

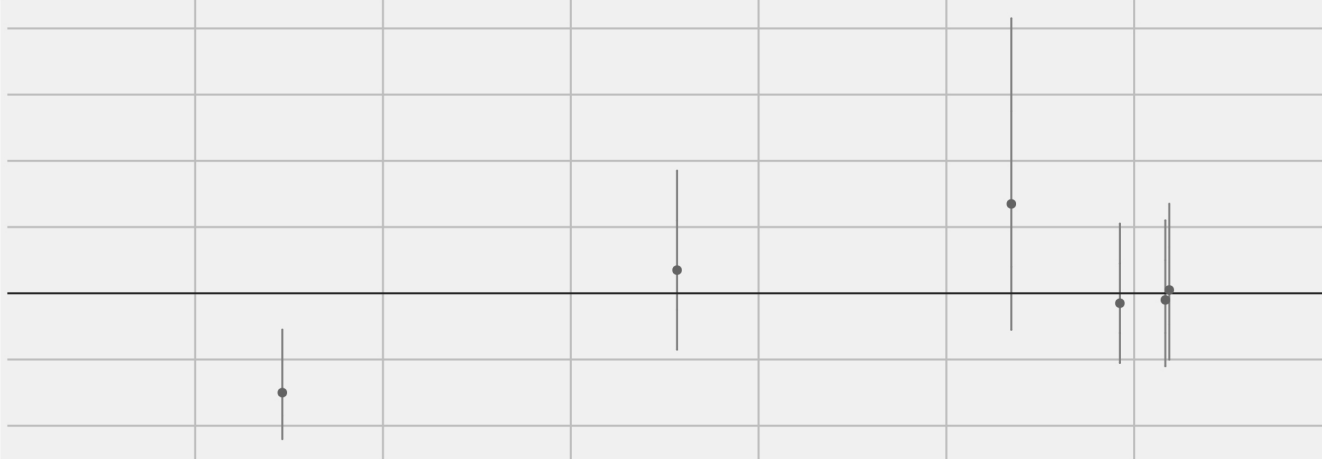

Supplement: epi-12-1273-s5.pdf [file epi-12-1273-s5.pdf]
