# Supplementary material
Source: PubMed Central journal article supplement (PMC7546161)

Chromosome 7

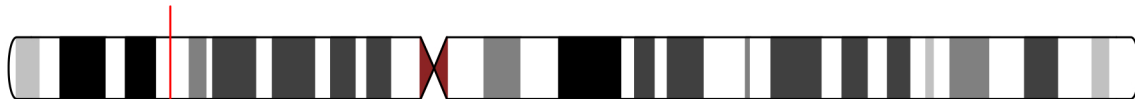

22.766 mb

22.768 mb

22.767 mb

Gene  
Annotation  
UCSC

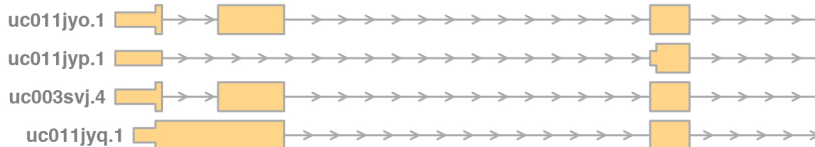

Gene  
Annotation  
ENSEMBL

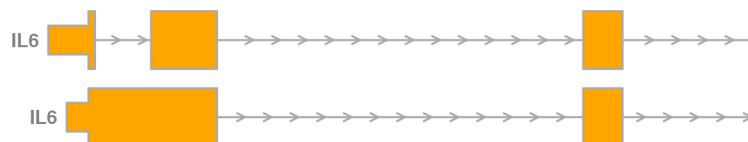

CpG  
Island

Chromatin  
State

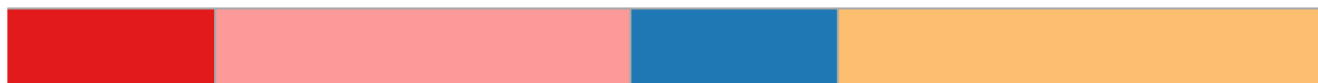

■ Flanking active TSS ■ Enhancer ■ Weak repressed polycomb ■ Quiescent/low

Expression  
Spearman's  $\rho$

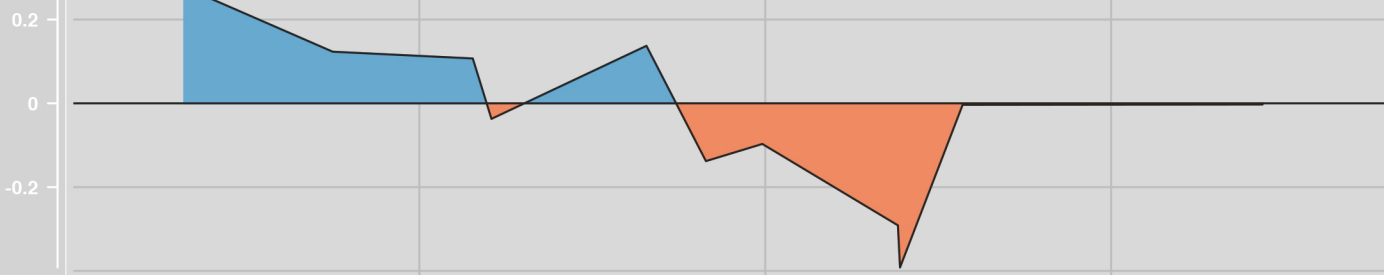

Overall Survival  
HR (95% CI)

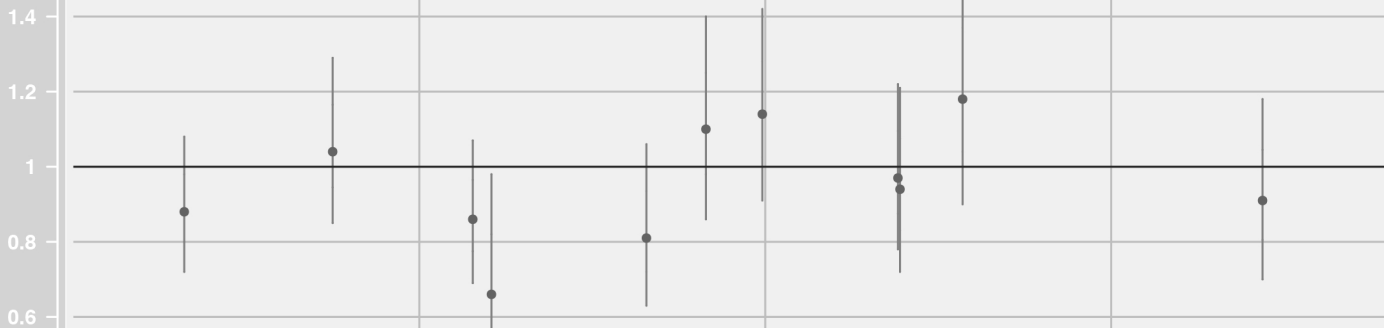

Supplement: epi-12-1273-s6.pdf [file epi-12-1273-s6.pdf]
