# Supplementary material
Source: PubMed Central journal article supplement (PMC7546161)

Chromosome 19

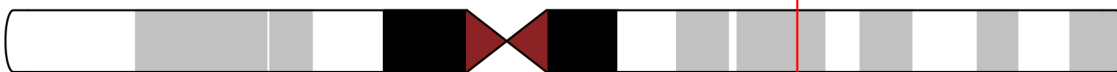

41.858 mb

41.86 mb

41.859 mb

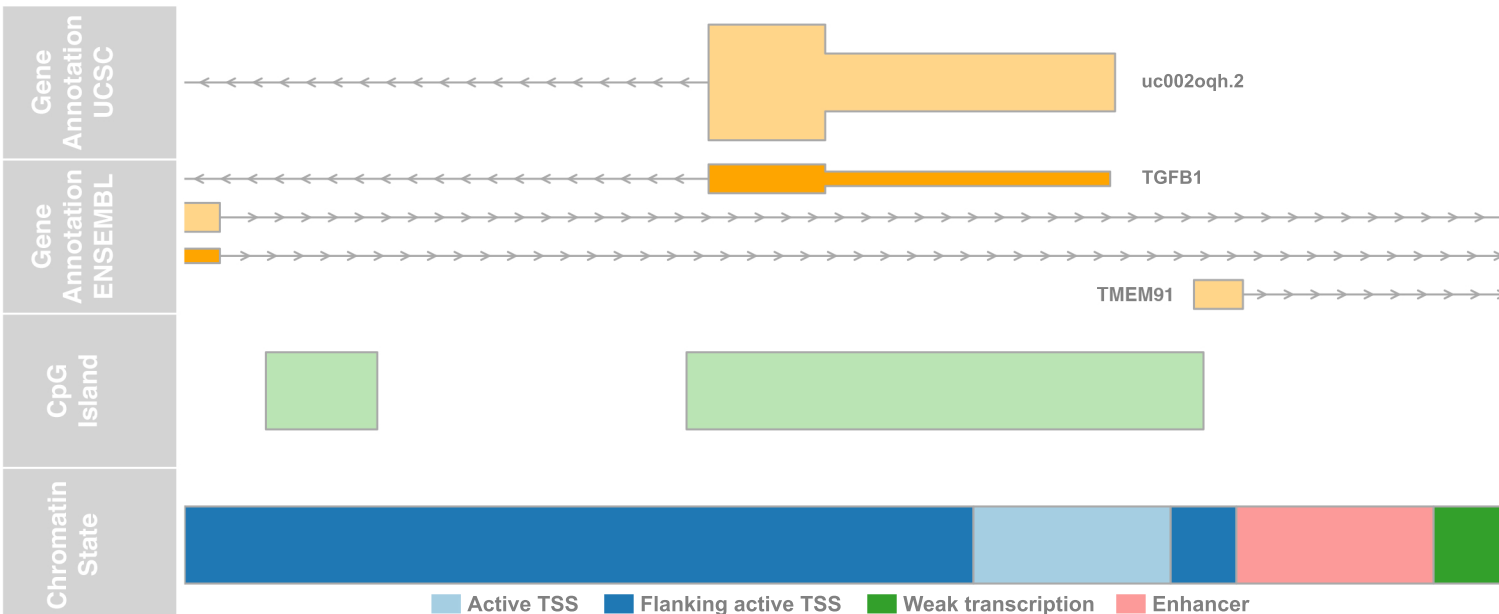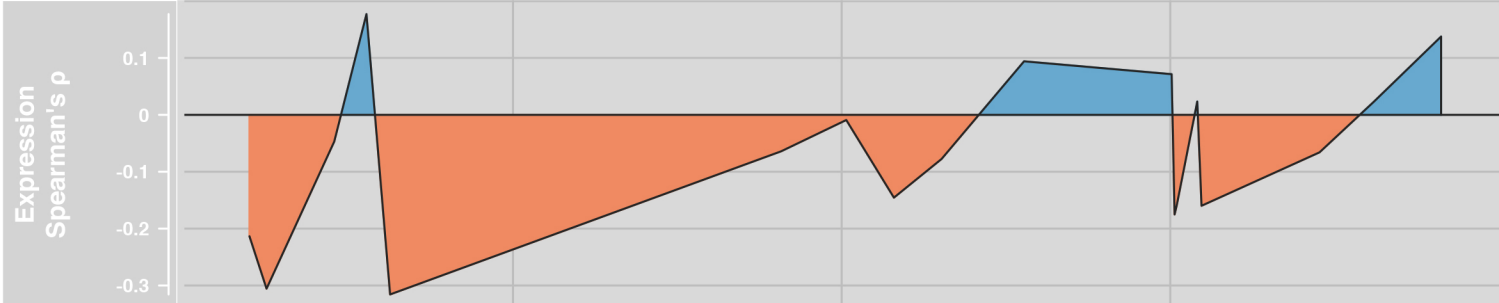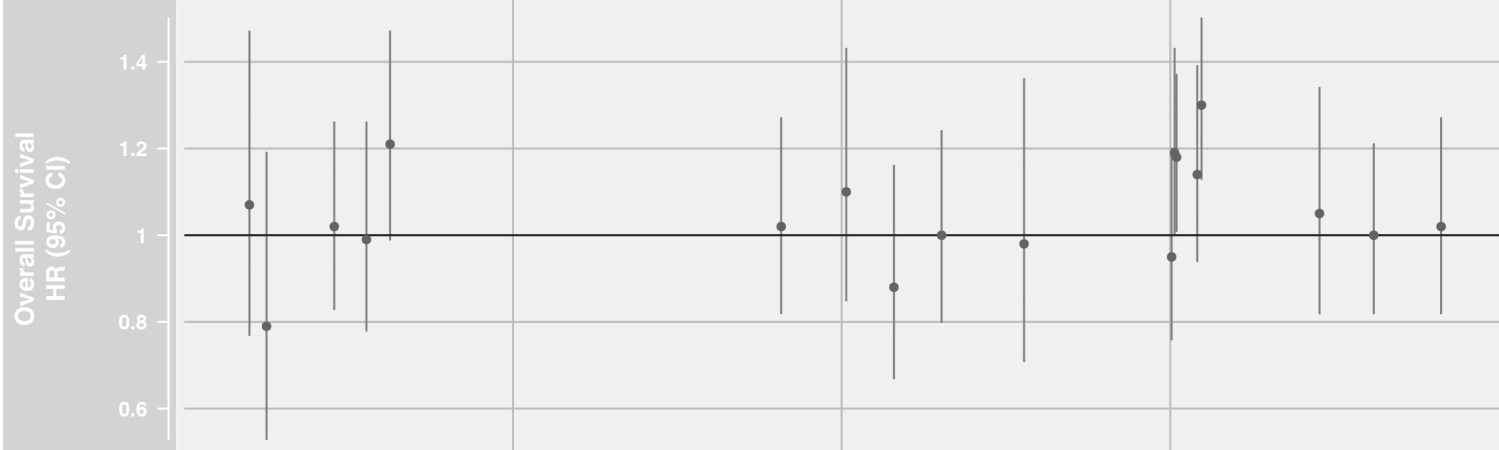

Supplement: epi-12-1273-s1.pdf [file epi-12-1273-s1.pdf]

Chromosome 1

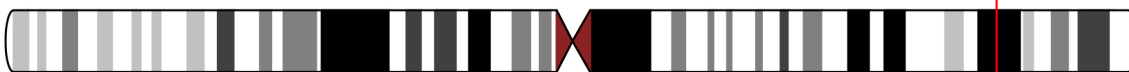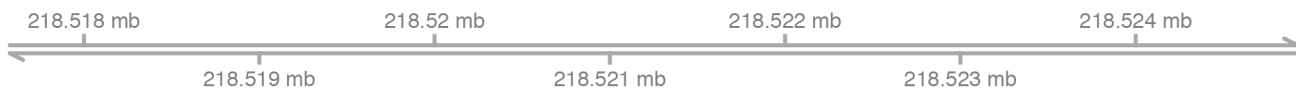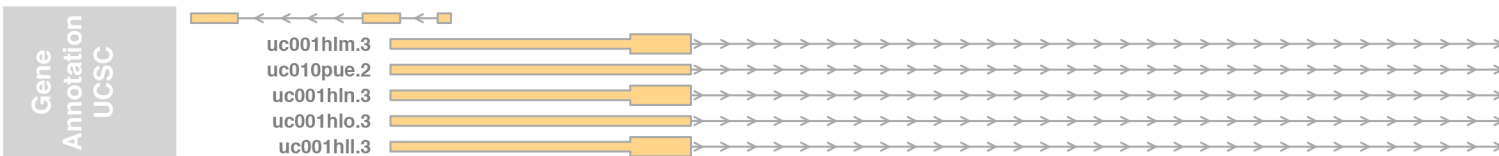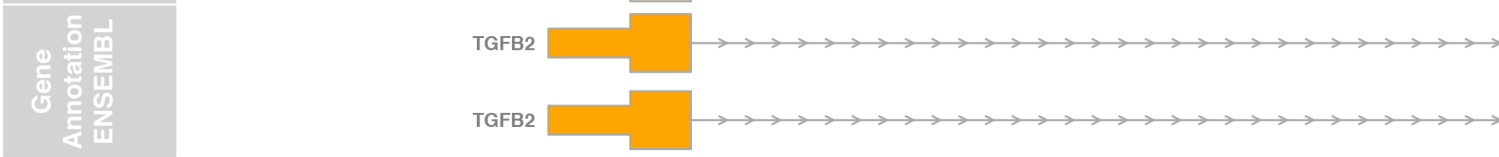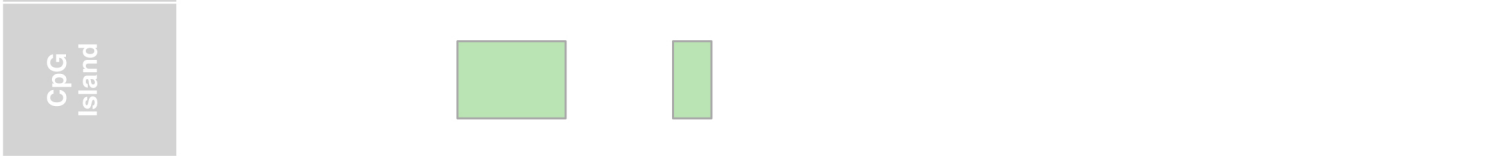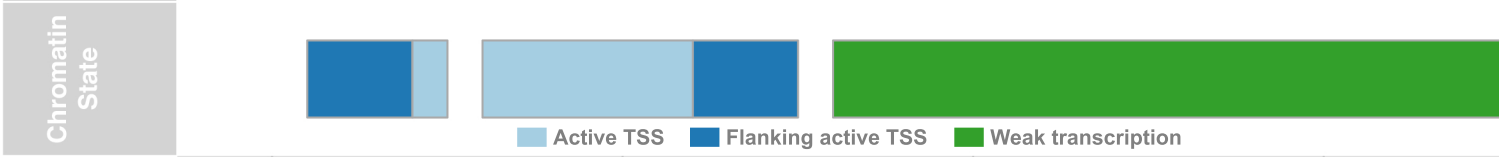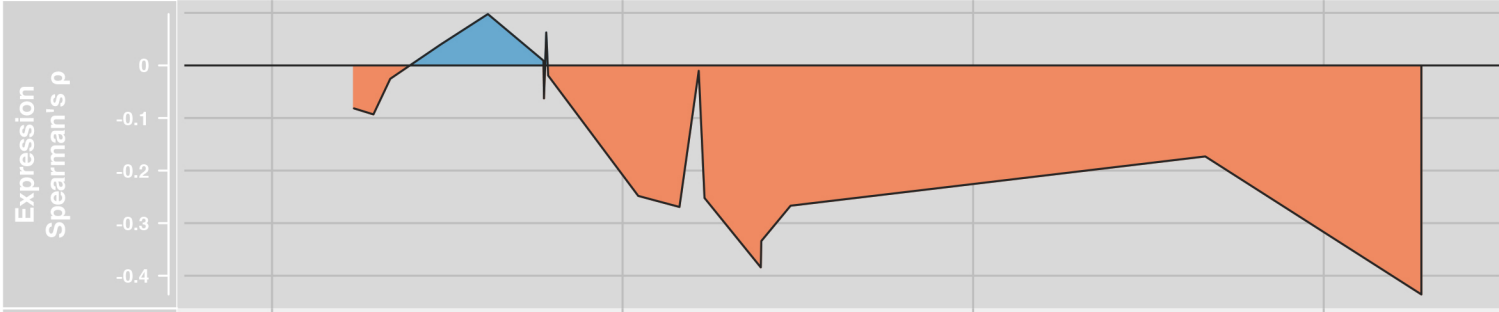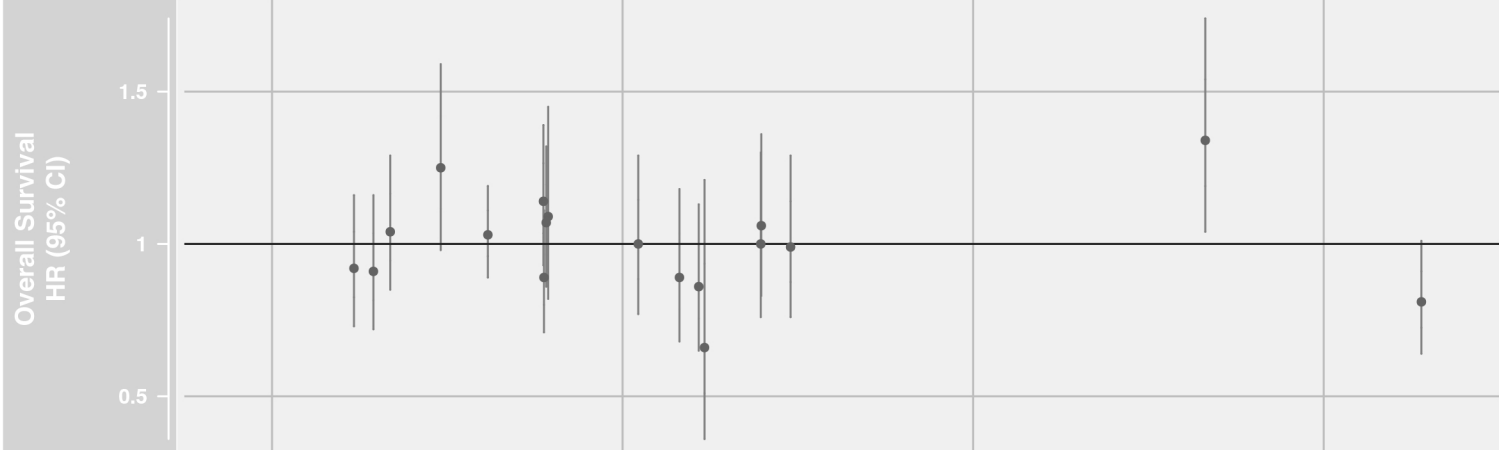

Supplement: epi-12-1273-s2.pdf [file epi-12-1273-s2.pdf]
